# Supplementary material for: Sequencing at sea: challenges and experiences in Ion Torrent PGM sequencing during the 2013 Southern Line Islands Research Expedition
Source: PeerJ journal article supplement (doi:10.7717/peerj.520), 2014-08-19
Supplement: Supplemental_Figure_3.pdf [file Supplemental_Figure_3.pdf]

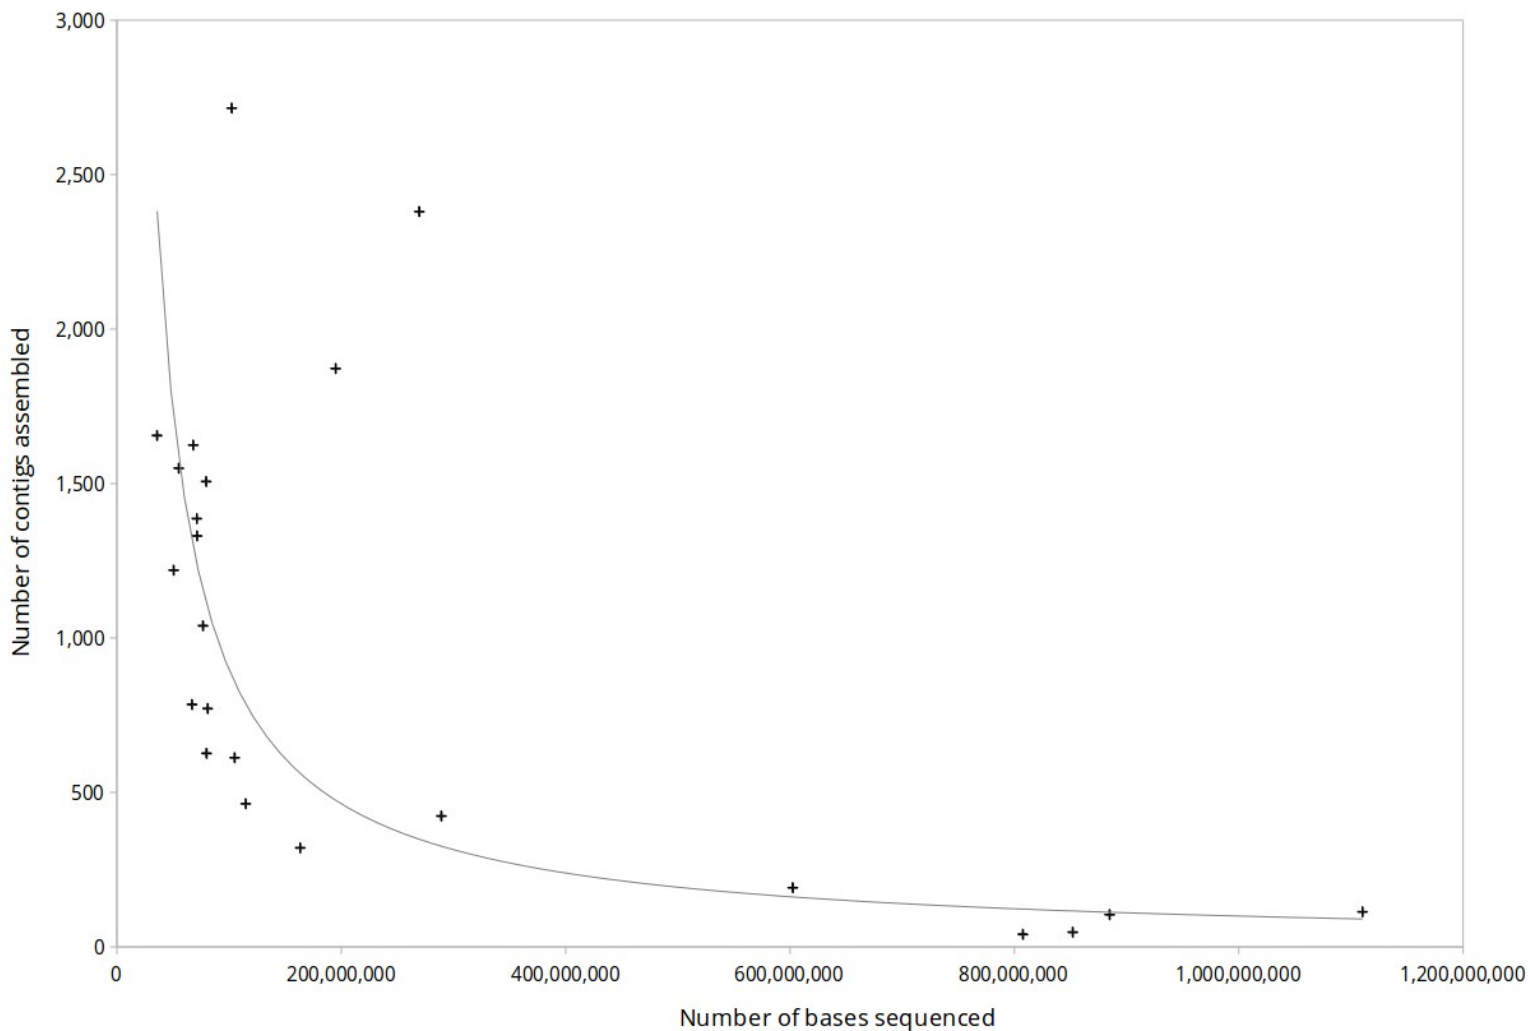

**Supplemental Figure 3.** Number of bases sequenced and number of contigs generated. The best-fit power regression of the data (shown with a gray line) has the equation [number of contigs] =  $3.87 * 10^{10}$  [base pairs sequenced]<sup>-0.95</sup> with an R<sup>2</sup> of 0.667.
